# Supplementary material for: In situ mutational screening and CRISPR interference define apterous cis-regulatory inputs during compartment boundary formation
Source: eLife. 2026 May 22;12:RP91713. doi: 10.7554/eLife.91713 (PMC13197166; doi:10.7554/eLife.91713)
Supplement: Figure 2—source data 1. [file elife-91713-fig2-data1.xlsx]

## Sheet: 3B
Control	N1/DG3	m1/DG3	m1m2m4/DG3
0.341734	0.232561	0.252818	0.237904
0.342303	0.277785	0.260859	0.258836
0.359133	0.259716	0.265243	0.26935
0.365136	0.222803	0.24823	0.247924
0.354689	0.248079	0.187474	0.249098
0.331419	0.267082	0.280195	0.25448
0.36541	0.211075	0.28191	0.215738
0.337486	0.242406	0.28593	0.278873
0.326897	0.229748	0.269824	0.231084
0.33844	0.284796	0.276054
0.395748	0.260996
0.345747	0.270786
0.34435	0.303259
	0.248239
	0.195403
	0.244411

## Sheet: 3B prime
Control	N1/DG3	m1/DG3	m1m2m4/DG3
0.208908	0.0121735	0	0
0.182566	0.0324156	0	0
0.180789	0.0398121	0.00134502	0
0.190089	0.0465555	0.00213361	0
0.189676	0.0620712	0.00142477	0
0.178547	0.1006	0.00524847	0
0.215074	0.0368229	0.00540758	0
0.226467		0.0278904	0
0.187317	0.0426072	0.00597616	0
0.207562	0.00806796	0.0078754
0.196812	0.0312952
0.166421	0.0464479
0.19838	0
	0.0423233
	0.0233009
	0
	0.0156103
