# Supplementary material for: In situ mutational screening and CRISPR interference reveal that the apterous Early enhancer is required for developmental boundary positioning
Source: eLife journal article supplement (doi:10.7554/elife.91713), 2023-10-11

## Supplementary File 1.

OR463 sequence and sub-regions

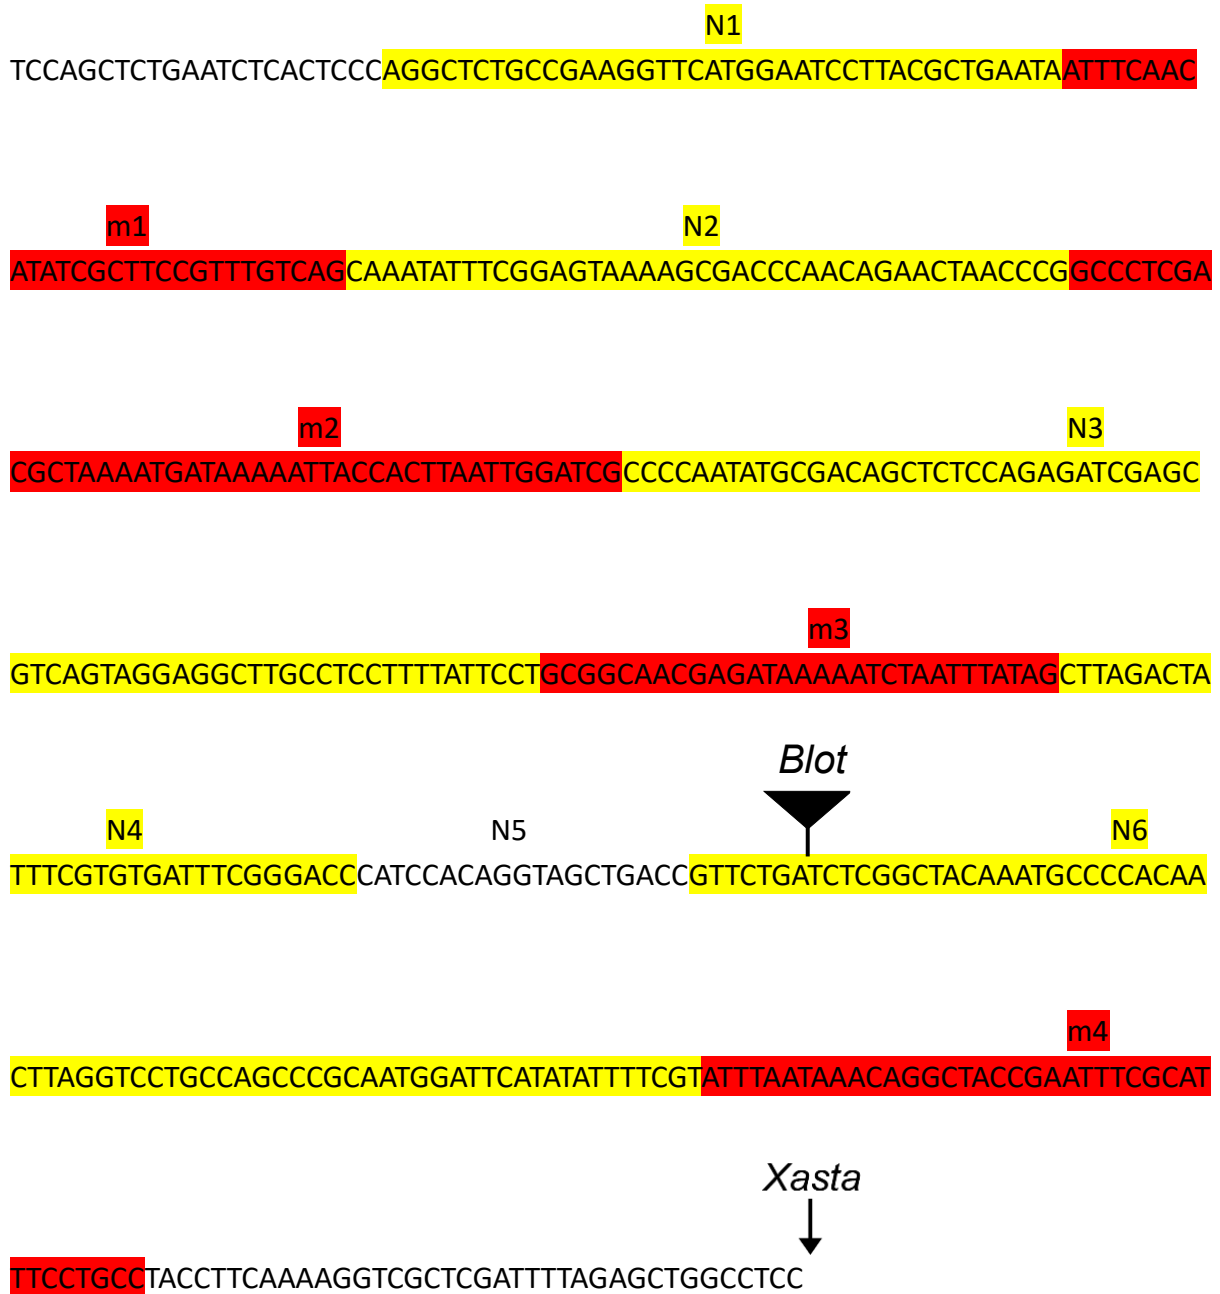

Supplement: supp1 [file elife-91713-supp1-v1.pdf]
